# Supplementary material for: Natural dye-mediated signal tracer strategy: a green route for ultra-efficient immunochromatographic detection of antibiotics
Source: Royal Society of Chemistry journal article supplement (doi:10.1039/d3gc01998e), 2023-01-01
Supplement: d3gc01998e1.pdf [file d3gc01998e1.pdf]

## **Natural dye-mediated signal tracer strategy: a green route for ultra-efficient immunochromatographic detection of antibiotic**

Shaochi Wang,<sup>a</sup> Ting Du,<sup>a</sup> Junqi Huangmin,<sup>a</sup> Sijie Liu,<sup>a</sup> Ying Zhu,<sup>a</sup> Daohong Zhang,<sup>a</sup> Jing Sun,<sup>b</sup> Yanru Wang,<sup>\*a</sup> LinTao Zeng<sup>\*c</sup> and Jianlong Wang<sup>\*a</sup>

<sup>a</sup> College of Food Science and Engineering, Northwest A&F University, Yangling 712100, Shaanxi, People's Republic of China.

<sup>b</sup> Qinghai Provincial Key Laboratory of Qinghai-Tibet Plateau Biological Resources, Northwest Institute of Plateau Biology, Chinese Academy of Sciences, Qinghai 810008, People's Republic of China.

<sup>c</sup> School of Light Industry and Food Engineering, Guangxi University, Nanning 530004, People's Republic of China.

\* Corresponding author: [wanglong79@nwsuaf.edu.cn](mailto:wanglong79@nwsuaf.edu.cn), [zlt1981@126.com](mailto:zlt1981@126.com),  
[yanruwang22@163.com](mailto:yanruwang22@163.com)

---

## NAST-ICA for CAP analysis

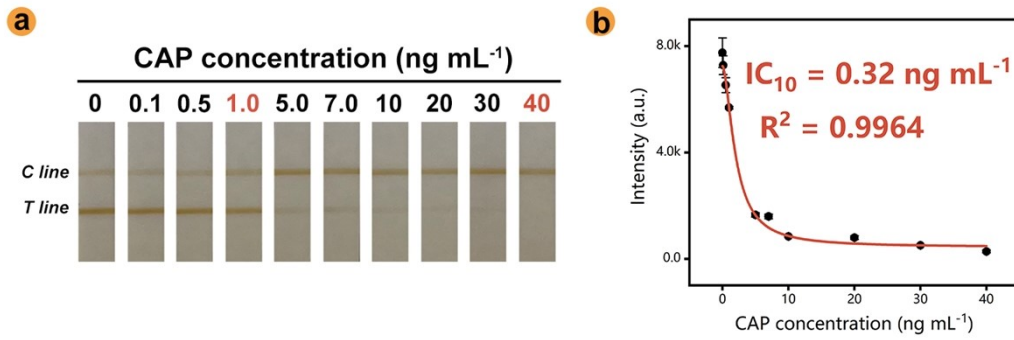

## NAST-ICA for NEO analysis

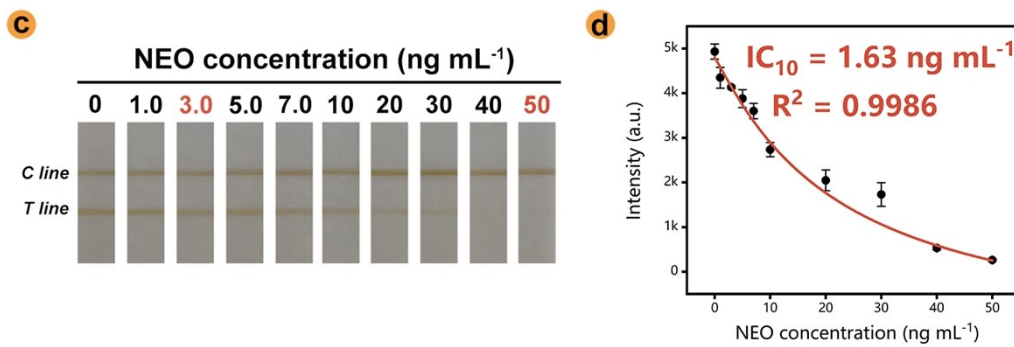

**Fig. S1** The applicability analysis of NAST-ICA. (a) Strip results and (b) corresponding nonlinear fitting curve of CAP analysis. (c) Strip results and (d) corresponding nonlinear fitting curve of NEO analysis.

**a**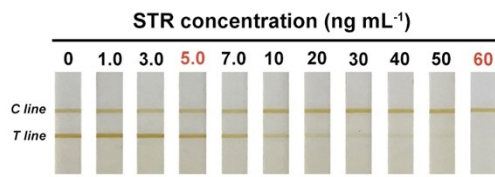**b**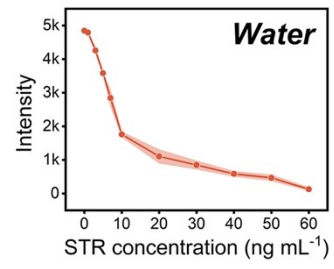

**Fig. S2** Recoveries results of NAST-ICA in actual water body. (a) Strip and (b) intensity results of water sample.

---

**Table S1.** Recovery validation experiments for the detection of STR spiked in water (n = 3).

| Sample | Added (ng mL <sup>-1</sup> ) | Mean found (ng mL <sup>-1</sup> ) ± SD | Recovery (%) | RSD (%) |
|--------|------------------------------|----------------------------------------|--------------|---------|
| Water  | 1                            | 1.18 ± 0.02                            | 118.18       | 1.99    |
|        | 5                            | 4.43 ± 0.09                            | 88.55        | 2.07    |
|        | 10                           | 9.31 ± 0.23                            | 93.08        | 2.44    |

**Table S2.** The cost of one strip from the material preparation to the detection finished.

|                            | Unit price       | Dosage       | Total (USD) |
|----------------------------|------------------|--------------|-------------|
| Alizarin                   | 0.14 USD/g       | 0.0021 g     | 0.000294    |
| Water                      | 0.0006 USD/mL    | 0.00225 mL   | 0.00000135  |
| Ethanol                    | 0.0028 USD/mL    | 0.00075 mL   | 0.0000021   |
| Anti-STR-mAbs              | 139.7 USD/mg     | 0.00018 mg   | 0.025146    |
| Ab <sub>2</sub> for probe  | 5.5875 USD/mg    | 0.00036 mg   | 0.0020115   |
| Ab <sub>2</sub> for C line | 5.5875 USD/mg    | 0.00003 mg   | 0.00016763  |
| STR-BSA                    | 139.7 USD/mg     | 0.0000075 mg | 0.00104775  |
| Sample pad                 | 0.0016 USD/mm    | 3 mm         | 0.0048      |
| Absorbent pad              | 0.0007 USD/mm    | 3 mm         | 0.0021      |
| NC membrane                | 0.0003911 USD/mm | 3 mm         | 0.0011733   |
| PVC plant                  | 0.0007 USD/mm    | 3 mm         | 0.0021      |
| Total                      |                  |              | 0.03884363  |
